# Supplementary material
Source: MDPI journal article supplement (https://www.mdpi.com/2077-1312/10/4/550)
Supplement: s1 [file s1]

Supplementary Materials

# Relationship between the Spatial and Temporal Distribution of Squid-Jigging Vessels Operations and Marine Environment in the North Pacific Ocean

Yingjie Fei <sup>1,†</sup>, Shenglong Yang <sup>2,3,†</sup>, Wei Fan <sup>2,3</sup>, Huimin Shi <sup>2,4</sup>, Han Zhang <sup>1</sup> and Sanling Yuan <sup>1,\*</sup> 

<sup>1</sup> College of Science, University of Shanghai for Science and Technology, Shanghai 200093, China; fyt93768@hotmail.com (Y.F.); zhanghan0429@hotmail.com (H.Z.)

<sup>2</sup> Key and Open Laboratory of Remote Sensing Information Technology in Fishing Resource, East China Sea Fisheries Research Institute, Chinese Academy of Fishery Sciences, Shanghai 200090, China; yangsl@ecsf.ac.cn (S.Y.); fanw@ecsf.ac.cn (W.F.); huimins0216@hotmail.com (H.S.)

<sup>3</sup> Key Laboratory of East China Sea & Oceanic Fishery Resources Exploitation and Utilization, Ministry of Agriculture, Shanghai 200090, China

<sup>4</sup> College of Information, Shanghai Ocean University, Shanghai 201306, China

\* Correspondence: sanling@usst.edu.cn

† These authors contributed equally to this work.

## 1. The GAM at different spatial resolutions

### 1.1. Spatial resolution of $0.1^\circ \times 0.1^\circ$

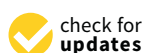

**Citation:** Fei, Y.; Yang, S.; Fan, W.; Shi, H.; Zhang, H.; Yuan, S. Relationship between the Spatial and Temporal Distribution of Squid-Jigging Vessels Operations and Marine Environment in the North Pacific Ocean. *J. Mar. Sci. Eng.* **2022**, *10*, 550. <https://doi.org/10.3390/jmse10040550>

Academic Editor: Francesco Tiralongo

Received: 31 January 2022

Accepted: 12 April 2022

Published: 17 April 2022

**Publisher's Note:** MDPI stays neutral with regard to jurisdictional claims in published maps and institutional affiliations.

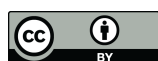

**Copyright:** © 2022 by the authors. Licensee MDPI, Basel, Switzerland. This article is an open access article distributed under the terms and conditions of the Creative Commons Attribution (CC BY) license (<https://creativecommons.org/licenses/by/4.0/>).

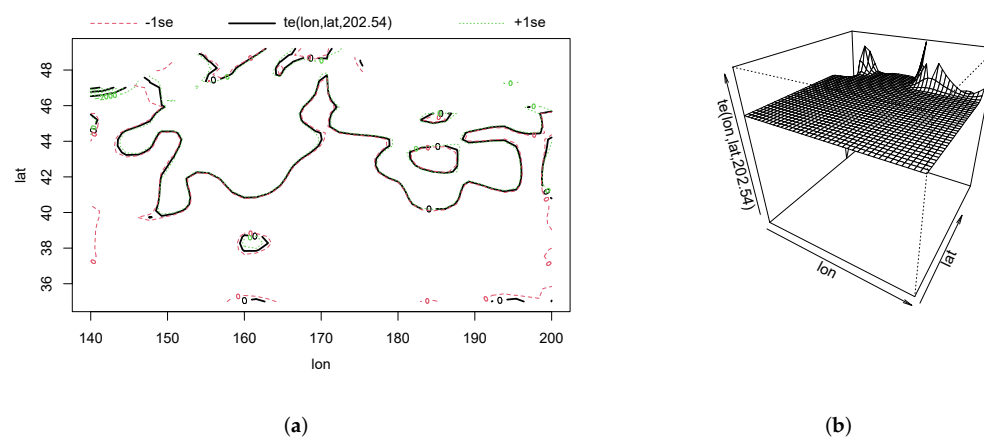

**Figure S 1.** (a) The plan of the impacts of latitude and longitude on fishing effort. (b) The three-dimensional diagram of the impacts of latitude and longitude on fishing effort.

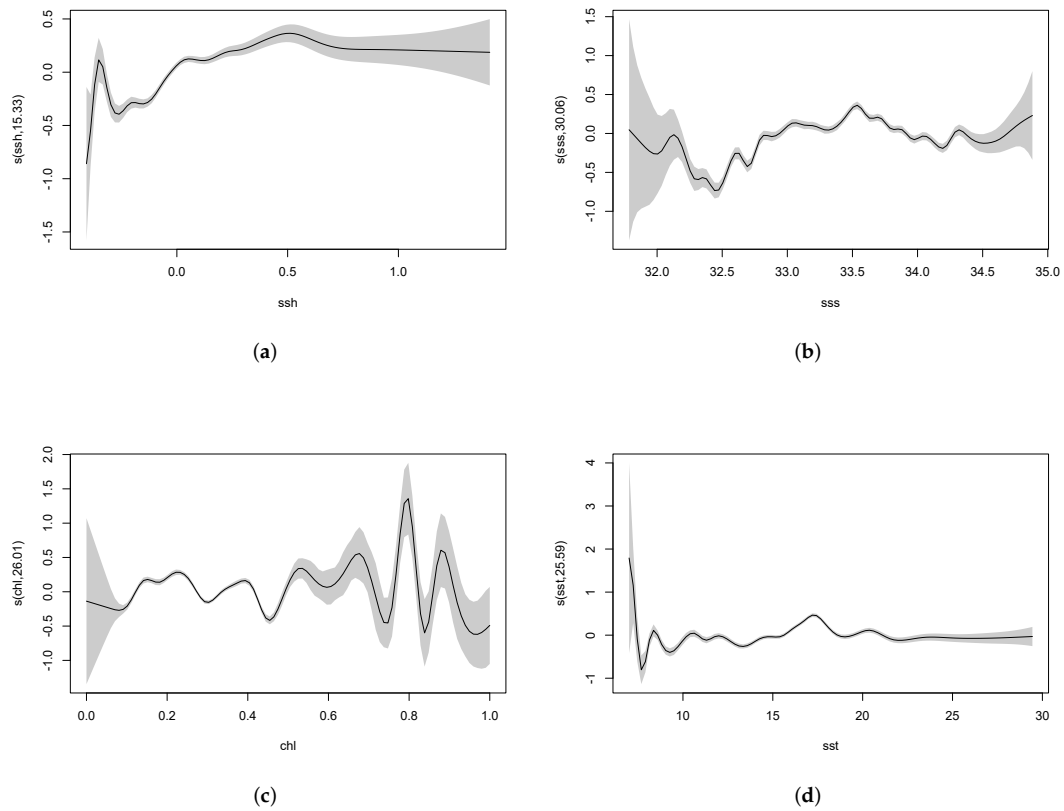

**Figure S 2.** (a) Impacts of SSH on fishing effort. (b) Impacts of SSS on fishing effort. (c) Impacts of Chl a on fishing effort. (d) Impacts of SST on fishing effort.

### 1.2. Spatial resolution of $0.25^\circ \times 0.25^\circ$

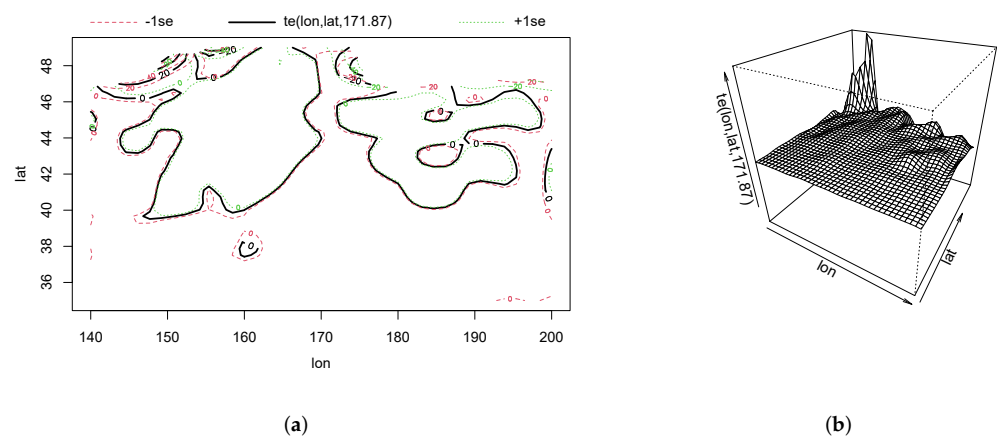

**Figure S 3.** (a) The plan of the impacts of latitude and longitude on fishing effort. (b) The three-dimensional diagram of the impacts of latitude and longitude on fishing effort.

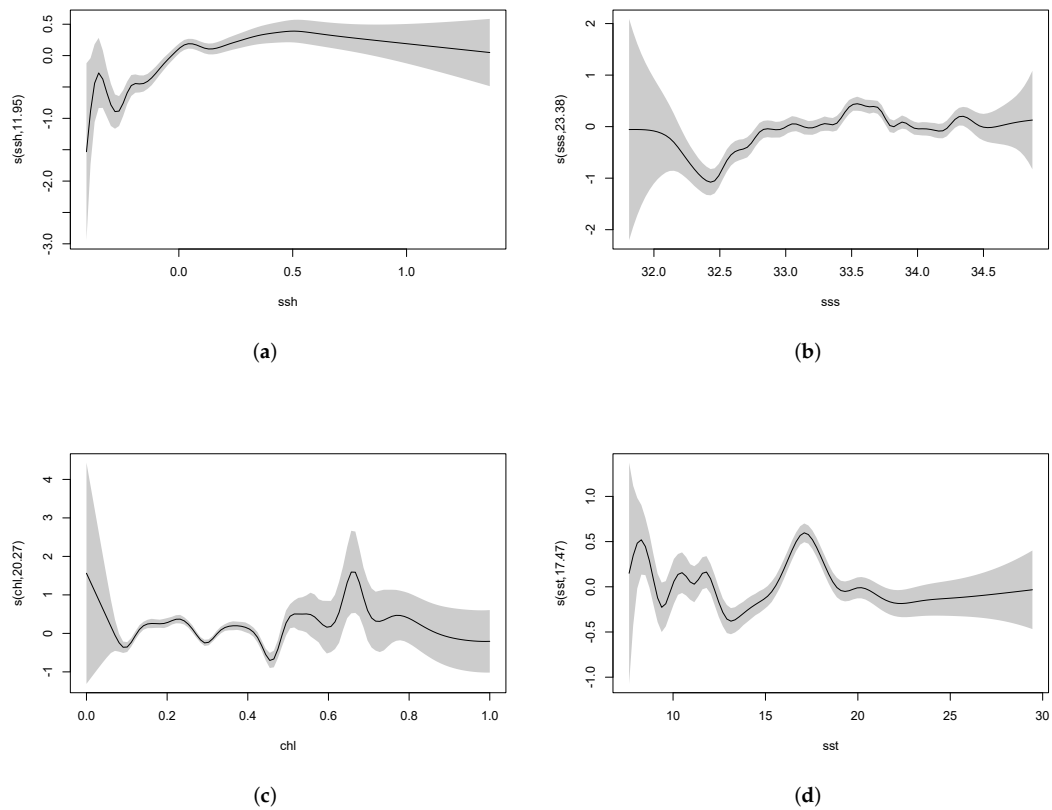

**Figure S 4.** (a) Impacts of SSH on fishing effort. (b) Impacts of SSS on fishing effort. (c) Impacts of Chl on fishing effort. (d) Impacts of SST on fishing effort.

### 1.3. Spatial resolution of $1^\circ \times 1^\circ$

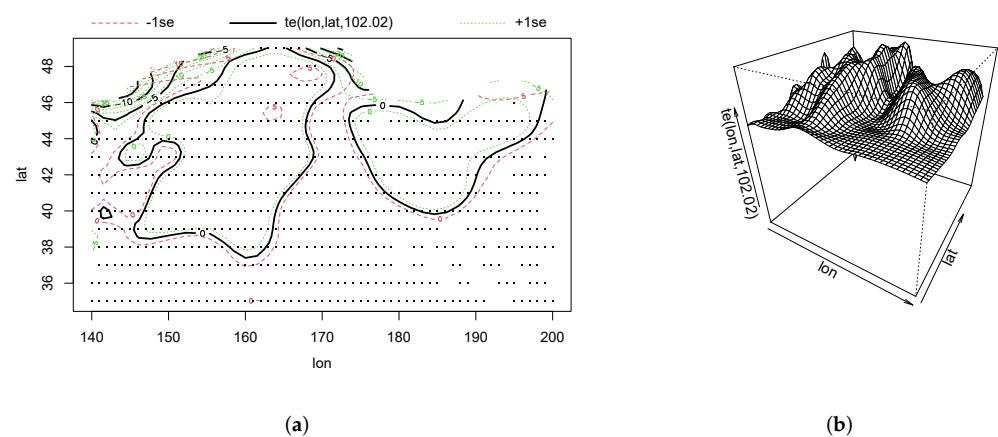

**Figure S 5.** (a) The plan of the impacts of latitude and longitude on fishing effort. (b) The three-dimensional diagram of the impacts of latitude and longitude on fishing effort.

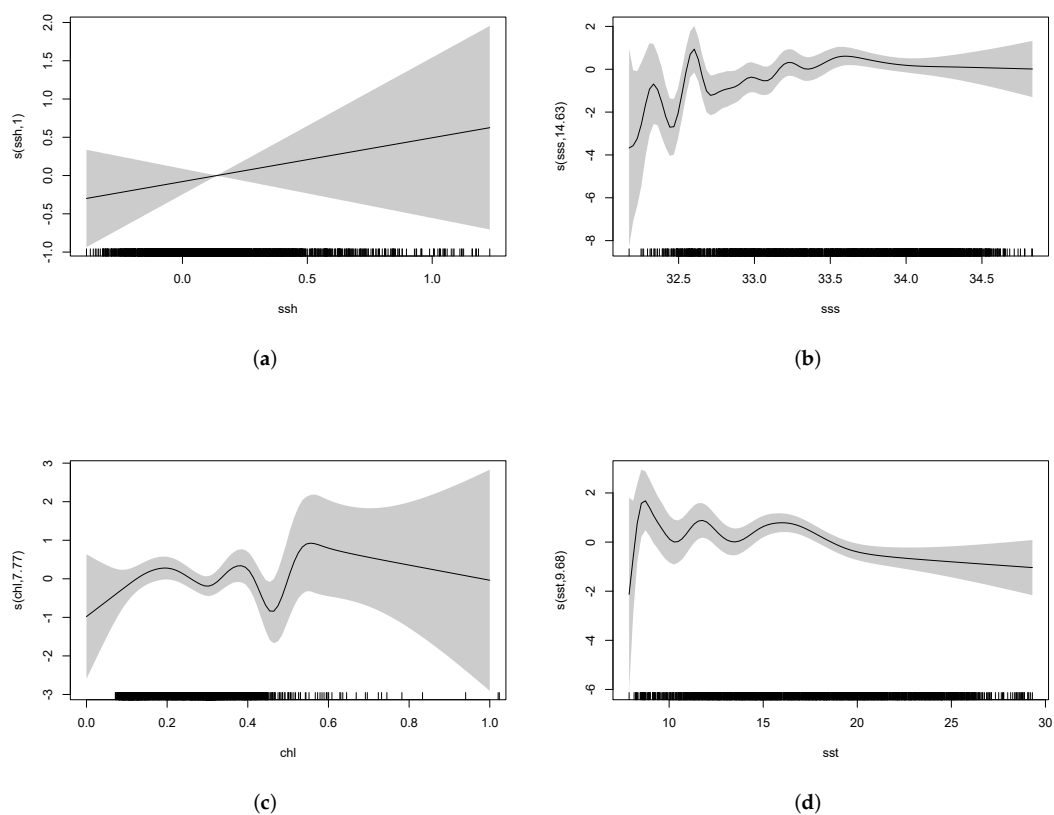

**Figure S 6.** (a) Impacts of SSH on fishing effort. (b) Impacts of SSS on fishing effort. (c) Impacts of Chl on fishing effort. (d) Impacts of SST on fishing effort.

## 2. The results of GAM without latitude and longitude

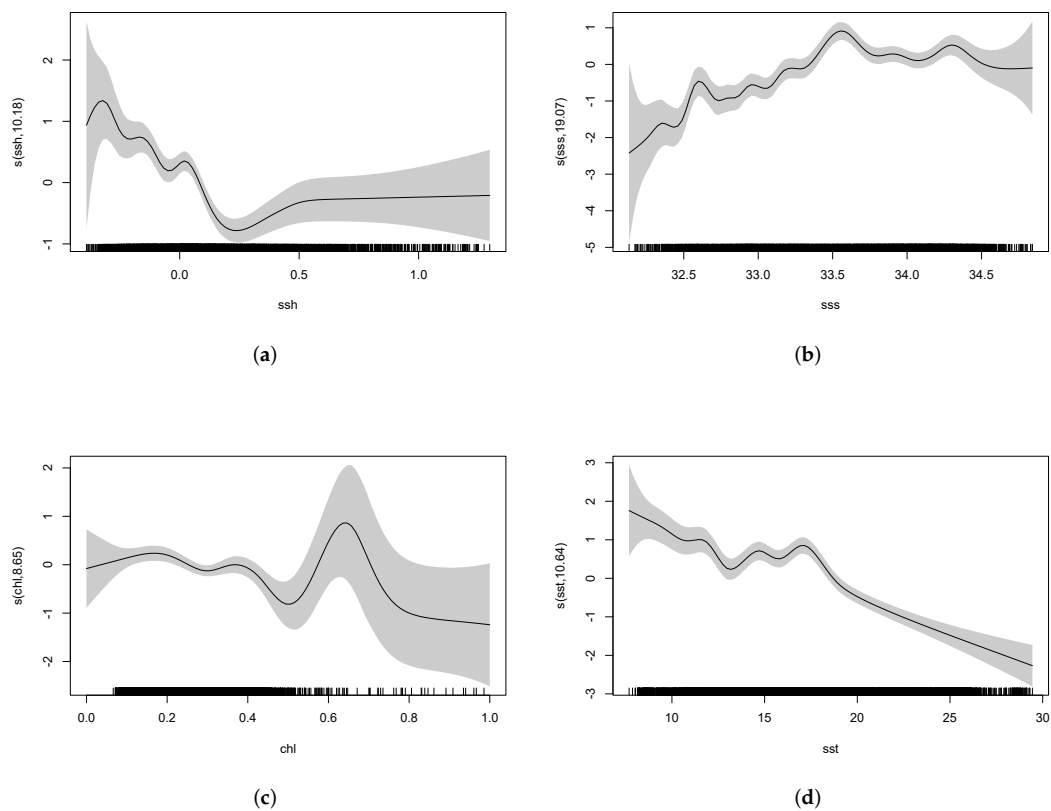

**Figure S 7.** (a) Impacts of SSH on fishing effort. (b) Impacts of SSS on fishing effort. (c) Impacts of Chla on fishing effort. (d) Impacts of SST on fishing effort.
